# Supplementary material
Source: publisher figshare collection journal article supplement (https://karger.figshare.com/ndownloader/files/27502796)
Supplement: Supplementary file 1 [file 27502796]

**Additional file:**

Demographic questions:

1. Gender: Male / Female

2. Age: Under 50 / 50 and above

3. Specialty: Adult gastroenterologist / Pediatric gastroenterologist

4. Main working place: Hospital / Clinic / Combination

5. Expertise in gastroenterology: Resident / <5 years / 5-10 years / Above 10 years

Questionnaire (1- completely disagree, 10- completely agree)

1. MC is effective for IBD 1 2 3 4 5 6 7 8 9 10

2. MC should be an integral part of IBD treatment 1 2 3 4 5 6 7 8 9 10

3. I am likely to prescribe MC for IBD 1 2 3 4 5 6 7 8 9 10

4. I use MC for Crohn's disease and ulcerative colitis equally 1 2 3 4 5 6 7 8 9 10

5. What percentage of patients used prior cannabis? 10 20 30 40 50 60 70 80 90 100

6. How many patients did you initiate use of MC? 10 20 30 40 50 60 70 80 90 100

7. Would you continue MC in this clinical scenario? A patient on MC has recurrent abdominal pain, in deep remission (inflammatory markers, endoscopy, and imaging), requesting to increase the dose? 1 2 3 4 5 6 7 8 9 10

8. What dose (gr) do you initiate treatment with MC? Unknown / 10 / 20 / 30 / 40 / 50 / 70 / above 70

9. What is the maximum dose (gr) of MC? Unknown / No max. dose / 30 / 50 / 70 / 100 / above 100

10. What mode do you mostly prescribe MC? Smoking / Vaporized / Oil / other combinations
